# Supplementary material
Source: PubMed Central journal article supplement (PMC7950857)

## Supplementary figure legends

**Supplementary Fig. 1. Hypertonic NaCl effect on resistance.** Wild-type mouse muscle-stripped gastric corpus was mounted into an Ussing chamber (area = 0.1 cm<sup>2</sup>) and transepithelial R were measured as described in Methods. Representative time course of percent (%) normalized R after addition of 0 M (black), 0.25 M (green), 0.5 M (blue), or 1.0 M (red) NaCl to luminal nutrient solution. Time zero starts 10 min baseline measurement prior to 5 min (NaCl arrow) exposure to NaCl challenge. At t = 30 min (arrow) shows the time point where change in ( $\Delta$ ) R at 15 min post NaCl was calculated.

**Supplementary Fig. 2. Controls for artifacts during 0.5 M NaCl challenge.** After reaching  $I_{sc}$  steady-state while either a glass coverslip **(A)** or permeable plastic wrap **(B)** was mounted in an Ussing chamber, 0.5 M NaCl was added luminally for 5 min (arrow). Outcomes identify  $I_{sc}$  changes caused by solution changes that are distinct from tissue active ion transport.

**Supplementary Fig. 3. Effect of omeprazole on basal  $I_{sc}$  and percent  $I_{sc}$  recovery.** Wild-type (WT) mouse muscle-stripped gastric corpus was mounted into an Ussing chamber (area = 0.1 cm<sup>2</sup>). Short circuit current ( $I_{sc}$ ) was measured as described in Methods. Results compared never ulcerated tissue (Control, black) or Intact tissue (black) versus the presence of 100  $\mu$ M omeprazole (OMZ, green-) added a minimum of 30 min prior to 0.5 M NaCl challenge (5 min) to both luminal and serosal bath. **(A)** Baseline  $I_{sc}$  of WT Control without OMZ (-) versus WT Control with OMZ (+), \* P < 0.05 (paired two-tailed t-test). **(B)** Percent (%)  $I_{sc}$  recovery for WT Intact (from Fig. 2C) without OMZ (-) versus WT Control with omz (+). **(C)** Percent (%)  $I_{sc}$  recovery for TFF2-KO Intact (from Fig. 4B) without OMZ (-) versus TFF2-KO Control with OMZ (+). Mean  $\pm$  SEM (n=4 WT Control or WT Intact or TFF2 Control, n=5 TFF2-KO Intact).

## Supplementary Fig. 1

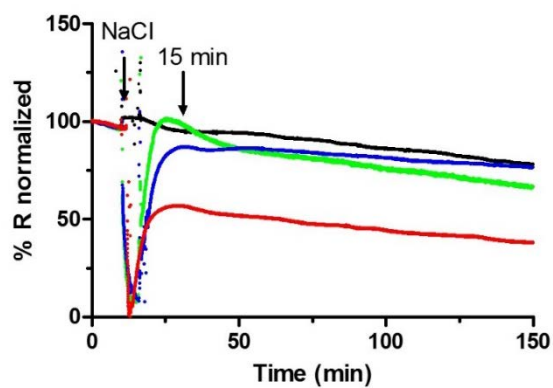

## Supplementary Fig. 2

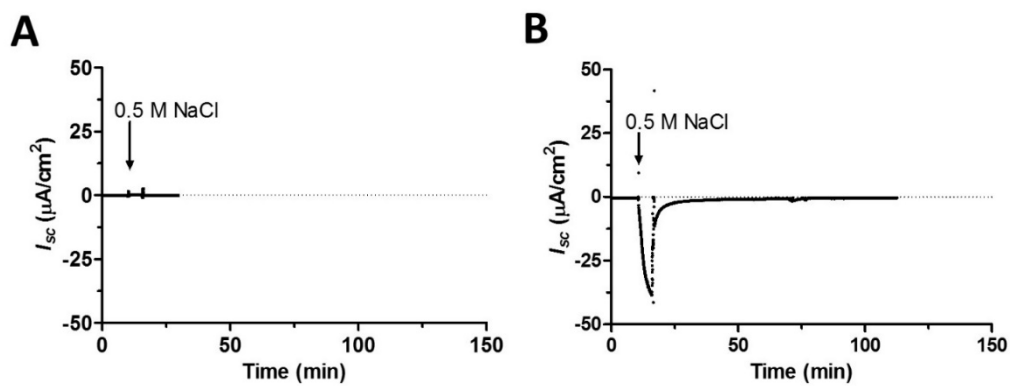

## Supplementary Fig. 3

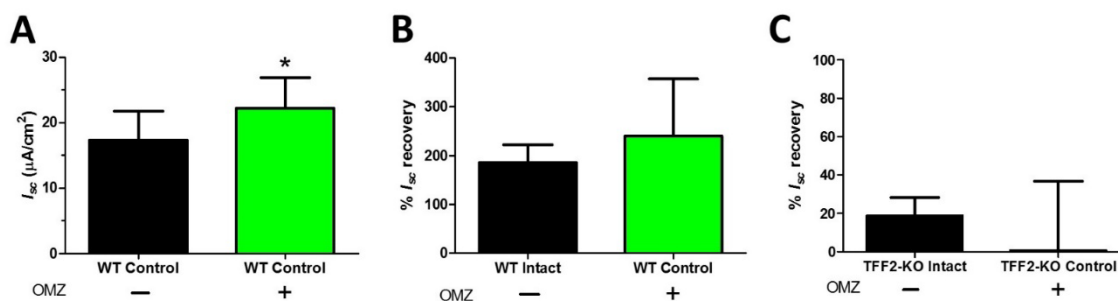

Supplement: NIHMS1573883-supplement-supplementary_data.pdf [file NIHMS1573883-supplement-supplementary_data.pdf]
